# Supplementary material for: Network pharmacology-based study on the mechanism of Yiganling capsule in hepatitis B treatment
Source: BMC Complement Med Ther. 2020 Feb 5;20:37. doi: 10.1186/s12906-020-2815-y (PMC7076828; doi:10.1186/s12906-020-2815-y)
Supplement: Supplementary file 9 — Additional file 9: Table S16. YGL capsule- Hepatitis B Disease target. Table S17. Four topological feature values of YGL capsule- Hepatitis B Disease target. [file 12906_2020_2815_MOESM9_ESM.xlsx]

## Sheet: Table16
Supplementary Table S16 YGL capsule- Hepatitis B Disease target network
Nodes	Target
URGCP	VIM
VCAM1	VIM
CMTR1	VAPA
LPGAT1	VAPA
VAPA	VCAM1
VAPA	VAPB
ADRA2C	UCHL1
ADRA2B	UCHL1
TRMT10C	TP53
TOP2A	VCAM1
PYGM	TOP1
TOP1	VCAM1
TOP1	TOP2A
TNFSF9	TNFRSF9
TNFRSF14	VIM
CPD	TNF
TNFAIP3	TNFSF10
TNFAIP3	TNFRSF1A
TNFAIP3	TNF
TLR4	TNFSF9
TICAM1	TRIM56
TICAM1	TNFAIP3
TICAM1	TLR4
TAP1	VAPA
TAP1	TAP2
SRPK2	YTHDC2
SRPK2	TOP1
SRPK2	SRXN1
MAOB	SRPK1
SRPK1	VDR
SRPK1	TOP2A
SRPK1	SRPK2
SON	SRPK2
SON	SRPK1
HIBADH	SOD1
SOD1	UBE3A
PDCD1	SOCS1
SOAT1	VAPA
SMN1	UCHL1
SMC5	SMN1
SMC5	SMC6
CPPED1	SEPSECS
SELL	SELE
RXRG	VDR
RXRB	VDR
RUVBL1	TNFRSF1A
RUVBL1	SRCAP
RUNX2	STAT3
RUNX1T1	VDR
RUNX1T1	SON
RIT2	SRPK2
RFX3	RFX4
RFX2	RFX4
RFX2	RFX1
RFX1	RFX3
STAT3	RELA
SOCS1	RELA
SOCS3	TNFSF10
SOCS3	RELA
RXRA	VDR
RXRA	STAT1
RXRA	SRC
RXRA	SMN1
RXRA	RELA
Sirt1	VDR
Sirt1	STAT3
Sirt1	SREBF1
Sirt1	RELA
RC3H1	VIM
E4F1	TP53
E4F1	RB1
E4F1	RASSF1
RASSF1	TNFRSF1A
RARB	RXRG
RARB	RXRB
RARB	RXRA
RAF1	SRC
RAF1	SGK1
RAF1	RB1
PTPRC	RASA1
PTPN1	STAT3
PTPN1	SRC
PTGS1	PTGS2
PSMD3	VCAM1
PSMD3	UBE3A
PTGS2	PSMD1
PSMB8	TAP2
PSMB8	TAP1
PSMB8	PSMD3
PSMB8	PSMD1
PSMB8	PSMB9
PSMB5	VIM
PSMB5	TAP1
PSMB5	PSMD3
PSMB5	PSMD1
PSMB5	PSMB9
PSMB5	PSMB8
PSMA7	VCAM1
PSMA7	SRPK1
PSMA7	RB1
PSMA7	PSMD3
PSMA7	PSMD1
PSMA7	PSMB9
PSMA7	PSMB8
PSMA7	PSMB5
PRRC2C	SRPK2
PPP3CA	SOD1
PPP3CA	RXRB
PPP3CA	PTEN
PPIB	RC3H1
PPARGC1A	Sirt1
PPARGC1A	RXRA
PPARGC1A	RELA
PPARG	VDR
PPARG	STAT1
PPARG	RXRG
PPARG	RXRB
PPARG	RXRA
PPARG	RELA
PPARG	RB1
PPARG	PSMD1
PPARG	PPARGC1A
PPARD	STAT3
PPARD	STAT1
PPARD	SRC
PPARD	RXRG
PPARD	RXRB
PPARD	RXRA
PPARD	RELA
PPARD	PPARGC1A
PPARA	STAT1
PPARA	Sirt1
PPARA	RXRG
PPARA	RXRB
PPARA	RXRA
PPARA	RELA
PPARA	PPARGC1A
CYP3A4	PRKCA
CYP3A4	PRKACA
CYP3A4	POR
POR	VAPA
POR	STAT1
CYP1A2	POR
URI1	RUVBL1
URI1	POLR2E
POLR2E	SRPK1
POLR2E	SRC
POLR2E	RUVBL1
POLR2E	POLR2A
PSMB9	TAP2
PSMB9	TAP1
PSMB9	SRC
PSMB9	PSMD3
PSMB9	PSMD1
PSMB9	POLR2E
PSMB9	POLR2A
INTS10	RAF1
INTS10	POLR2E
INTS10	POLR2A
POLR2A	VDR
POLR2A	SRC
POLR2A	SMN1
POLR2A	RXRA
POLR2A	RELA
GOLPH3	PNKD
SELE	PLCG1
PLAT	PLAU
ACBD3	SARS
ACBD3	PKN2
PKN2	VAPB
PKN2	SOAT1
PKN2	PTEN
PKN2	PLCG1
PKIA	PRKACA
GABRA3	PIK3R1
PGR	UBE3A
PGR	STAT3
PGR	SRC
PGR	RELA
PELI1	SRPK2
PELI1	SRPK1
PCOLCE	PLG
COL3A1	PCOLCE
PCNA	XRCC1
PCNA	TOP1
PCNA	PPIB
PCNA	POLR2A
PATL1	TOP2A
PATL1	PSMA3
PARP1	XRCC1
PARP1	VCAM1
PARP1	TOP1
PARP1	Sirt1
PARP1	RXRA
PARP1	RELA
PARP1	RC3H1
PARP1	PGR
PARP1	PCNA
OPRM1	VAPA
OPRD1	VAPA
OPRD1	OPRM1
OCLN	TNFAIP3
OAS3	TOP1
NR5A2	PPARGC1A
NR1I3	SRC
NR1I3	RXRA
NR1I3	PPARGC1A
NR1I3	PML
NR1I2	TP53
NR1I2	SRC
NR1I2	RXRG
NR1I2	RXRB
NR1I2	RXRA
NR1I2	PPARGC1A
NR1I2	NR5A2
NQO1	TP53
NQO1	PARP1
NOV	RELA
NOS3	Sirt1
NOP16	SRPK2
NOP16	SRPK1
NOP16	NPM1
NOLC1	SRPK2
NOLC1	NOP16
NKX3-1	TOP1
IRF1	STAT1
IRF1	RELA
IRF1	NPM1
IRF1	NFKB1
NFKB1	VIM
NFKB1	STAT3
NFKB1	SOCS3
NFKB1	SARAF
NFKB1	RXRA
NFKB1	RUVBL1
NFKB1	RSF1
NFKB1	RELA
NFKB1	PPARGC1A
NFKB1	PPARG
NFKB1	POLR2A
NFKB1	PML
NFKB1	PARP1
NFKB1	NOV
NFE2L2	PPARG
NFE2L2	NQO1
NELFCD	VIM
NELFCD	UBE3A
NELFA	POLR2A
NELFA	NELFCD
NCOA2	VDR
NCOA2	TP53
NCOA2	SRCAP
NCOA2	RXRA
NCOA2	PSMB9
NCOA2	PPARG
NCOA2	PPARD
NCOA2	PPARA
NCOA2	PML
NCOA2	PGR
NCOA2	NR5A2
NCOA2	NR1I3
NCOA2	NR1I2
NR3C2	RXRA
NR3C2	PPID
NR3C2	NCOA1
NCOA1	VDR
NCOA1	TP53
NCOA1	STAT3
NCOA1	RXRB
NCOA1	RXRA
NCOA1	RARB
NCOA1	PSMB9
NCOA1	PPARGC1A
NCOA1	PPARG
NCOA1	PPARD
NCOA1	PPARA
NCOA1	PGR
NCOA1	NR5A2
NCOA1	NR1I3
NCOA1	NR1I2
NCOA1	NFKB1
NCOA1	NCOA2
MGAM	NCF1
CP	PLG
CP	MPO
MMP9	TGFB1
MMP9	PLG
MMP3	SPP1
MMP3	SERPINE1
MMP3	PLG
MMP2	TGFB1
MBL2	PTPRC
MAPK3	VDR
MAPK3	TP53
MAPK3	STAT3
MAPK3	SREBF1
MAPK3	SRC
MAPK3	RXRA
MAPK3	RAF1
MAPK3	PTPRC
MAPK3	PTGS2
MAPK3	PPARA
MAPK3	PNKD
MAPK3	PML
MAPK3	PLAT
MAPK3	PARP1
MAPK3	NUP153
MAPK3	MYC
MAPK3	MAPK8
MAPK3	MAPK14
MAPK14	TP53
MAPK14	STAT1
MAPK14	SRPK1
MAPK14	RELA
MAPK14	RB1
MAPK14	PPARGC1A
MAPK14	PML
MAPK14	PLG
MAPK14	NUP153
MAPK14	NCF1
MAPK10	TP53
MAPK10	RELA
PRKCD	TP53
PRKCD	TOP2A
PRKCD	TNFRSF1A
PRKCD	STAT3
PRKCD	STAT1
PRKCD	SRC
PRKCD	RUNX2
PRKCD	RAF1
PRKCD	PPARA
PRKCD	PIK3CA
PRKCD	OPRD1
PRKCD	NFE2L2
PRKCD	NCF1
PRKCD	MAPK3
PRKCD	MAPK1
MAP2	SRC
LYZ	TP53
LYZ	NFKB1
SPATS2L	USMG5
SPATS2L	LTBR
LTBR	VAPB
LTBR	VAPA
LTA4H	Sirt1
LTA	TNFRSF1A
LTA	TNFRSF14
LTA	LTBR
LGALS9	MET
LAMTOR5	TP53
LAMTOR5	TGFB1
LAMTOR5	PPARA
KRT19	VCAM1
KRT19	RAF1
MICB	KLRK1
RASA1	SRC
RASA1	SOCS3
RASA1	SOCS1
RASA1	RB1
RASA1	KDR
VEGFA	KDR
STAT1	VDR
STAT1	TNFRSF1A
STAT1	STAT3
STAT1	SARS
STAT1	RELA
STAT1	KDR
NPM1	VCAM1
NPM1	TP53
NPM1	TOP1
NPM1	SMN1
NPM1	Sirt1
NPM1	RELA
NPM1	RC3H1
NPM1	RB1
NPM1	PUM3
NPM1	PSMD1
NPM1	PPID
NPM1	POLR2E
NPM1	PML
NPM1	PLCG1
NPM1	PIK3R1
NPM1	PARP1
NPM1	KDR
KCTD9	PNKD
JUN	VDR
JUN	TOP2A
JUN	TOP1
JUN	STAT3
JUN	STAT1
JUN	Sirt1
JUN	RUNX2
JUN	RELA
JUN	RB1
JUN	PPP3CA
JUN	PPARG
JUN	PML
JUN	PARP1
JUN	NFE2L2
JUN	NCOA2
JUN	NCOA1
JUN	MYC
JUN	MAPK8
JUN	MAPK3
JUN	MAPK14
JUN	MAPK10
JUN	MAPK1
JAK1	TOP1
JAK1	TNFRSF1A
JAK1	STAT3
JAK1	STAT1
JAK1	SOCS3
JAK1	SOCS1
JAK1	Sirt1
JAK1	RAF1
JAK1	PTPRC
JAK1	PRKCA
JAK1	PML
JAK1	PLCG1
JAK1	PIK3R1
JAK1	NPM1
ISG15	VIM
ISG15	TOP2A
ISG15	STAT1
ISG15	PSMA7
ISG15	MX1
ISG15	LDHA
IRF3	TICAM1
IRF3	SOCS1
IRF3	RELA
IRF3	RB1
IRF3	PPIB
IRF3	POLR2A
IRF3	MAVS
IRF3	MAPK8
INSR	SRC
INSR	SOCS3
INSR	SOCS1
INSR	RASA1
INSR	RAF1
INSR	PTPRC
INSR	PTPN1
INSR	PRKCD
INSR	PRKCA
INSR	PLCG1
INSR	PIK3R1
INSR	MAPK3
INSR	MAPK1
INSR	JAK1
IL13	VCAM1
IL13	PIK3R1
IL13	IL4R
IL2RA	STAT3
IL2RA	NFKB1
IL2RA	IL2
MYC	XDH
MYC	VDR
MYC	TP53
MYC	TOP2A
MYC	TOP1
MYC	Sirt1
MYC	SARS
MYC	RUVBL1
MYC	RELA
MYC	RB1
MYC	RAF1
MYC	PSMD3
MYC	PSMB5
MYC	PSMA7
MYC	PSMA3
MYC	POLR2A
MYC	PML
MYC	PLAU
MYC	PIM1
MYC	NUP153
MYC	NFE2L2
MYC	IKBKG
PRKCB	TOP2A
PRKCB	TNFRSF1A
PRKCB	RB1
PRKCB	PRKCD
PRKCB	PIK3CG
PRKCB	OCLN
PRKCB	NCF1
PRKCB	IKBKG
PRKCE	STAT1
PRKCE	SRC
PRKCE	RAF1
PRKCE	OPRD1
PRKCE	MAPK3
PRKCE	MAPK1
PRKCE	IKBKG
IL1B	PTPN1
IL1B	MMP2
IL1B	IKBKG
KRT18	VCAM1
KRT18	SERPINE1
KRT18	RAF1
KRT18	PRKCE
KRT18	PRKCA
KRT18	NOS2
KRT18	MAPK14
KRT18	KRT8
KRT18	IKBKG
KRT8	VCAM1
KRT8	RAF1
KRT8	PRKCE
KRT8	PLAT
KRT8	NOS2
KRT8	MAPK8
KRT8	MAPK3
KRT8	MAPK14
KRT8	MAPK1
KRT8	IKBKG
MAVS	TRIM14
MAVS	TICAM1
MAVS	STAT1
MAVS	SRC
MAVS	PSMA7
MAVS	OAS3
MAVS	IKBKG
IKBKG	VIM
IKBKG	TRIM14
IKBKG	TNFRSF1A
IKBKG	TNFAIP3
IKBKG	TNF
IKBKG	SRPK1
IKBKG	SRC
IKBKG	SGK1
IKBKG	RELA
IKBKG	PSMB8
IKBKG	PSMA3
IKBKG	POLR2E
IKBKG	PARP1
IKBKG	NFKB1
IKBKG	LTBR
RBCK1	TNFAIP3
RBCK1	TNF
RBCK1	PRKCB
RBCK1	PRKCA
RBCK1	PML
RBCK1	NR1I2
RBCK1	LTBR
RBCK1	IKBKG
IKBKE	UCHL1
IKBKE	TNFAIP3
IKBKE	TICAM1
IKBKE	SSB
IKBKE	RUVBL1
IKBKE	RELA
IKBKE	PSMD3
IKBKE	PSMD1
IKBKE	PSMA7
IKBKE	PPIB
IKBKE	PML
IKBKE	PCNA
IKBKE	PARP1
IKBKE	NPM1
IKBKE	MAVS
IKBKE	LTA4H
IKBKE	IRF3
IKBKE	IKBKG
IGHM	SMN1
IGHG1	VCAM1
IGHG1	IKBKG
IGF2	PLG
IGF2	NOV
IGF2	INSR
IFNL2	IFNLR1
IL10RB	IL10
IL10RB	IFNL3
IL10RB	IFNL2
IFNGR1	STAT1
IFNGR1	SOCS1
IFNGR1	NFKB1
IFNGR1	JAK1
IFNGR1	IFNGR2
IFNG	TNF
IFNG	IFNGR2
IFNG	IFNGR1
IFNAR2	STAT3
IFNAR2	STAT1
IFNAR2	PRKCB
IFNAR2	JAK1
IFNB1	IFNAR2
IFNB1	IFNAR1
IFNA2	ISG15
IFNA2	IFNAR2
IFNA2	IFNAR1
IFNAR1	STAT3
IFNAR1	STAT1
IFNAR1	SOCS1
IFNAR1	PTPRC
IFNAR1	PRKACA
IFNAR1	PIK3R1
IFNAR1	MAPK1
IFNAR1	JAK1
IFNAR1	IFNAR2
IFNA1	IL2
IFNA1	IFNAR2
IFNA1	IFNAR1
IFNA1	IFNA8
IFNA8	ISG15
IFNA8	IFNAR2
IFNA8	IFNAR1
IFIT1	MOV10
IFIT1	ISG15
IFIT1	IFNA8
IFIH1	MAVS
IFIH1	IKBKE
DDX60L	IFI16
CCDC86	SRPK2
CCDC86	NPM1
CCDC86	IFI16
CA2	PCNA
CA2	HSPD1
CDK5RAP3	RELA
CDK5RAP3	NPM1
CDK5RAP3	HSPB1
HTR3A	HSPA5
HSF1	UBE3A
HSF1	STAT1
HSF1	Sirt1
HSF1	PPID
HSF1	MAPK8
HSF1	MAPK3
HSF1	MAPK1
HSF1	HSPB1
ITPA	VPS4B
ITPA	HNRNPA1
SSB	TNFRSF14
SSB	SPP1
SSB	RXRB
SSB	HNRNPA1
ICAM1	NPM1
ICAM1	NOS2
ICAM1	IL2RA
ICAM1	IFI16
ICAM1	HNRNPA1
NOS2	SRC
NOS2	SMN1
NOS2	SERPINE1
NOS2	PSMD3
NOS2	PSMA7
NOS2	PSMA3
NOS2	NPM1
NOS2	HNRNPA1
HSPA5	UBE3A
HSPA5	TP53
HSPA5	TNFRSF1A
HSPA5	TG
HSPA5	Sirt1
HSPA5	RELA
HSPA5	RC3H1
HSPA5	RAF1
HSPA5	PTEN
HSPA5	PSMD1
HSPA5	PSMA3
HSPA5	PPIB
HSPA5	PDE3A
HSPA5	NPM1
HSPA5	NOS2
HSPA5	NFKBIA
HSPA5	NFKB1
HSPA5	NCOA1
HSPA5	LDLR
HSPA5	LAMTOR5
HSPA5	KRT8
HSPA5	KRT18
HSPA5	IKBKG
HSPA5	IKBKB
HSPA5	IGHM
HSPA5	HSPB1
HSPA5	HSP90AB1
HSPA5	HNRNPD
HSPA5	HNRNPA1
IGSF8	OCLN
IGSF8	NPM1
IGSF8	HNRNPA1
LDHA	VCAM1
LDHA	SOD1
LDHA	PSMA3
LDHA	PCNA
LDHA	MAPK10
LDHA	HNRNPA1
LAMP1	TNFAIP3
LAMP1	LGALS3
LAMP1	HNRNPA1
MX1	RELA
MX1	HNRNPA1
TP53	XRCC1
TP53	VIM
TP53	VDR
TP53	UCHL1
TP53	UBE3A
TP53	TP53RK
TP53	TOP2A
TP53	TOP1
TP53	TNFAIP3
TP53	SULT1E1
TP53	SRPK1
TP53	SRC
TP53	SOCS1
TP53	SMN1
TP53	Sirt1
TP53	RUNX2
TP53	RELA
TP53	RB1
TP53	PTGS2
TP53	PTEN
TP53	PRRC2C
TP53	PPP3CA
TP53	PPARGC1A
TP53	PML
TP53	PCNA
TP53	PARP1
TP53	HNRNPA1
HNRNPK	VCAM1
HNRNPK	TP53
HNRNPK	TOP1
HNRNPK	SRPK2
HNRNPK	SRC
HNRNPK	Sirt1
HNRNPK	RC3H1
HNRNPK	PRKCD
HNRNPK	PIK3R1
HNRNPK	MYC
HNRNPK	MAPK10
HNRNPK	ISG15
HNRNPK	IGSF8
HNRNPK	ICAM1
HNRNPK	HNRNPA1
MOV10	TP53
MOV10	HNRNPA1
PSMA3	VCAM1
PSMA3	TNFRSF14
PSMA3	SRPK2
PSMA3	SERPINB3
PSMA3	RUVBL1
PSMA3	PSMD3
PSMA3	PSMD1
PSMA3	PSMB9
PSMA3	PSMB8
PSMA3	PSMB5
PSMA3	PSMA7
PSMA3	HNRNPA1
MRPL3	HNRNPA1
APOBEC3B	IFI16
APOBEC3B	HNRNPA1
IGF2BP1	VCAM1
IGF2BP1	TP53
IGF2BP1	MYC
IGF2BP1	MOV10
IGF2BP1	IKBKE
IGF2BP1	IFIT1
IGF2BP1	HNRNPA1
HNRNPA1	VCAM1
HNRNPA1	TOP1
HNRNPA1	SUPV3L1
HNRNPA1	SRPK2
HNRNPA1	SRPK1
HNRNPA1	SMN1
HNF1A	VIM
HNF1A	STAT3
HNF1A	SRC
HNF1A	Sirt1
HNF1A	NCOA1
HNF1A	LDHA
HMOX1	POR
HMGCR	PRKACA
NR3C1	UBE3A
NR3C1	TP53
NR3C1	STAT3
NR3C1	SSB
NR3C1	SRC
NR3C1	RXRB
NR3C1	RELA
NR3C1	RAF1
NR3C1	PRRC2C
NR3C1	PRKACA
NR3C1	PPP3CA
NR3C1	PPID
NR3C1	PPARGC1A
NR3C1	PPARG
NR3C1	PML
NR3C1	NR3C2
NR3C1	NFKB1
NR3C1	NCOA2
NR3C1	NCOA1
NR3C1	MAPK8
NR3C1	MAPK1
NR3C1	JUN
NR3C1	IFNGR2
NR3C1	HNRNPA1
NR3C1	HMGB1
HMGB1	TP53
HMGB1	TLR4
HMGB1	RFX1
HMGB1	RELA
HMGB1	RB1
HMGB1	PRKCA
HMGB1	PPP2R3A
HMGB1	PLG
HMGB1	PLAT
HMGB1	PGR
HMGB1	NFKB1
HMGB1	MAPK1
HMGB1	HNRNPK
HMGB1	HNF1A
HLA-E	TAP2
HLA-DRB1	HSP90AB1
HLA-DRB1	HLA-DRA
MICA	TNFSF9
MICA	KLRK1
MICA	HLA-C
HK2	TIGAR
HK2	PRKCE
HK2	IRF3
SLC2A4	HK2
HIST1H1E	PRKCA
HIST1H1E	IGSF8
HIST1H1E	ICAM1
HIST1H1E	HNRNPA1
HIF1A	TP53
HIF1A	STAT3
HIF1A	SRC
HIF1A	RUNX2
HIF1A	RELA
HIF1A	RB1
HIF1A	PSMA7
HIF1A	PARP1
HIF1A	NCOA2
HIF1A	NCOA1
HIF1A	MYC
HIF1A	MAPK3
HIF1A	MAPK1
HIF1A	JUN
HIF1A	HSP90AB1
HGF	PLAU
HGF	MET
GSTP1	VCAM1
GSTP1	MAPK8
GSTP1	MAPK14
GSTP1	MAPK1
GSTP1	ISG15
GSTP1	HNRNPA1
GSTM2	PTEN
GSTM1	GSTM2
GSR	RB1
GSR	LDHA
GSR	ISG15
GSK3B	VIM
GSK3B	TP53
GSK3B	TOP2A
GSK3B	SREBF1
GSK3B	SMN1
GSK3B	SGK1
GSK3B	RXRA
GSK3B	RELA
GSK3B	RASSF1
GSK3B	PTPN1
GSK3B	PRKCB
GSK3B	PRKCA
GSK3B	PRKACA
GSK3B	PPID
GSK3B	PPARGC1A
GSK3B	NFKB1
GSK3B	NFE2L2
GSK3B	MYC
GSK3B	MAPK1
GSK3B	JUN
GSK3B	IKBKG
GSK3B	IGHM
GSK3B	IGF2BP1
GSK3B	HNRNPD
GRIA2	PRKCA
CHRM4	GRB2
GPS2	TP53
GPS2	NR5A2
GPS2	MAPK3
GJA1	SRC
GJA1	PRKCE
GJA1	PRKCB
GJA1	PRKCA
GJA1	NOV
GJA1	MAPK3
GJA1	MAPK1
GFAP	VIM
GFAP	UBE3A
GFAP	STAT1
GFAP	SRC
GFAP	PRKCA
GFAP	PRKACA
GFAP	IKBKG
GFAP	HSPA5
GFAP	GRB2
GABRA1	PRKCD
GABRA1	PPP3CA
GABARAPL2	VDR
GABARAPL2	VAPA
GABARAPL2	RASSF1
GABARAPL2	PSMD1
GABARAPL2	PSMA7
AIRE	TOP2A
AIRE	SRC
AIRE	POLR2A
AIRE	PLCG1
AIRE	PIK3R1
AIRE	PCNA
AIRE	PARP1
AIRE	HSPA5
AIRE	HSP90AB1
AIRE	GRB2
AIRE	FYN
PTK2B	STAT3
PTK2B	SRC
PTK2B	SOCS3
PTK2B	RASA1
PTK2B	PTEN
PTK2B	PRKCD
PTK2B	PIK3R1
PTK2B	JAK1
PTK2B	HSP90AB1
PTK2B	GRB2
PTK2B	FYN
FOXP3	Sirt1
FOXP3	RELA
FOSL2	JUN
FOSL2	FOS
FOS	VDR
FOS	STAT1
FOS	SRPK1
FOS	Sirt1
FOS	RUNX2
FOS	RELA
FOS	RB1
FOS	PRKACA
FOS	POLR2E
FOS	PML
FOS	NQO1
FOS	NFKB1
FOS	NCOA2
FOS	NCOA1
FOS	MAPK1
FOS	JUN
FOS	HNF1A
APOBEC3C	SRPK2
APOBEC3C	IFI16
APOBEC3C	FN1
CRP	MAPK3
CRP	MAPK1
CRP	FN1
FLNB	VCAM1
FLNB	PTEN
FLNB	PSMD3
FLNB	PLCG1
FLNB	PIK3R1
FLNB	NPM1
FLNB	MAPK8
FLNB	ISG15
FLNB	HSPB1
FLNB	GRB2
FBXL2	PIK3R1
FBXL2	HSP90AB1
NCF1	RELA
NCF1	PTEN
NCF1	NFKB1
NCF1	FASLG
RB1	VDR
RB1	TOP2A
RB1	STAT3
RB1	Sirt1
RB1	RUNX2
RB1	FAS
FYN	XRCC1
FYN	TNFRSF1A
FYN	TNF
FYN	STAT3
FYN	STAT1
FYN	SRC
FYN	SOCS1
FYN	RAF1
FYN	PTPRC
FYN	PRKCE
FYN	PRKCD
FYN	PLCG1
FYN	PIK3R1
FYN	NR3C1
FYN	MAP2
FYN	KDR
FYN	IL1B
FYN	IKBKG
FYN	HSP90AB1
FYN	HNRNPK
FYN	GRB2
FYN	FASLG
FYN	FAS
PRKCA	VPS4B
PRKCA	TP53
PRKCA	TOP2A
PRKCA	SRC
PRKCA	SPP1
PRKCA	SELL
PRKCA	RAF1
PRKCA	PRKCE
PRKCA	PPARG
PRKCA	PPARA
PRKCA	OPRD1
PRKCA	OCLN
PRKCA	NPM1
PRKCA	NFE2L2
PRKCA	NCF1
PRKCA	FAS
SRC	VDR
SRC	TNFRSF1A
SRC	TLR9
SRC	TLR4
SRC	STAT3
SRC	STAT1
SRC	SRPK2
SRC	KDR
SRC	FASLG
SRC	FAS
FASLG	TNFRSF1A
FASLG	FAS
TNFRSF1A	UCHL1
TNFRSF1A	FAS
TNF	TNFSF9
TNF	TNFRSF1A
TNF	LTBR
TNF	LTA
TNF	FAS
MET	STAT3
MET	SRC
MET	SOCS3
MET	SOCS1
MET	SH2B3
MET	RASA1
MET	PTPRC
MET	PTPN1
MET	PLCG1
MET	PIK3R1
MET	KDR
MET	FAS
MAPK8	TP53
MAPK8	TNFRSF1A
MAPK8	STAT3
MAPK8	Sirt1
MAPK8	SERPINB3
MAPK8	RB1
MAPK8	RASSF1
MAPK8	RAF1
MAPK8	PPARG
MAPK8	PIK3R1
MAPK8	NFE2L2
MAPK8	MYC
MAPK8	MAPK14
MAPK8	FASLG
MAPK8	FAS
PML	UBE3A
PML	STAT3
PML	STAT1
PML	Sirt1
PML	RXRA
PML	RUNX2
PML	RELA
PML	RB1
PML	PSMA3
PML	PPARGC1A
PML	PPARG
PML	POLR2E
PML	FAS
PLCG1	SRC
PLCG1	SH2B3
PLCG1	RASA1
PLCG1	PML
PLCG1	KDR
PLCG1	FAS
F7	IKBKG
F7	F3
PLG	RUVBL1
PLG	RELA
PLG	PLAU
PLG	PLAT
PLG	F3
SPP1	PARP1
SPP1	F2
IGFBP3	RXRA
IGFBP3	PPARG
IGFBP3	PLG
IGFBP3	MMP3
IGFBP3	MMP2
IGFBP3	MMP1
IGFBP3	IGF2
IGFBP3	F2
F8	HSPA5
F8	F2
SERPINE1	PSMA3
SERPINE1	PLG
SERPINE1	PLAU
SERPINE1	PLAT
SERPINE1	F2
F2	THBD
F2	PLAU
F2	PLAT
ESR2	UBE3A
ESR2	SREBF1
ESR2	SRC
ESR2	PPARGC1A
ESR2	NCOA2
ESR2	NCOA1
ESR2	MAPK1
ERBB3	SRPK2
ERBB3	SRC
ERBB3	SH2B3
ERBB3	RASA1
ERBB3	PTK2B
ERBB3	PLCG1
ERBB3	PIK3R1
ERBB3	PIK3CA
ERBB3	MET
ERBB3	HSPA5
ERBB3	HSP90AB1
ERBB3	HCK
ERBB3	GRB2
ERBB3	GFAP
HSP90B1	TP53
HSP90B1	TLR4
HSP90B1	TG
HSP90B1	RXRB
HSP90B1	PSMA3
HSP90B1	PPIB
HSP90B1	POLR2E
HSP90B1	PCNA
HSP90B1	NKX3-1
HSP90B1	MTTP
HSP90B1	LDLR
HSP90B1	IKBKG
HSP90B1	HSPA5
HSP90B1	GABRA1
HSP90B1	FOS
HSP90B1	ESR1
HSP90B1	ERBB2
EPHA2	VPS4B
EPHA2	RASA1
EPHA2	PIK3R1
EPHA2	HSP90AB1
EPHA2	GRB2
CLDN4	EPHA2
ELK1	MAPK8
ELK1	MAPK3
ELK1	MAPK14
ELK1	MAPK10
ELK1	MAPK1
ELK1	GRB2
ELK1	FOS
GLTSCR2	SRPK2
GLTSCR2	PUM3
GLTSCR2	NPM1
GLTSCR2	EIF6
HNRNPD	VCAM1
HNRNPD	TNFRSF1A
HNRNPD	PRKACA
HNRNPD	LDHA
HNRNPD	IGSF8
HNRNPD	ICAM1
HNRNPD	HSPB1
HNRNPD	HNRNPK
HNRNPD	HNRNPA1
HNRNPD	EIF6
EIF6	VCAM1
EIF6	VAPA
EIF6	UCHL1
EIF6	TOP2A
EIF6	RUVBL1
EIF6	PUM3
EIF6	PRKCB
EIF6	PPIB
EIF6	OAS3
EIF6	NPEPPS
IFI16	YTHDC2
IFI16	TRIM56
IFI16	TP53
IFI16	TOP2A
IFI16	SRPK1
IFI16	SPATS2L
IFI16	SON
IFI16	PUM3
IFI16	POLR2A
IFI16	PML
IFI16	NUP153
IFI16	NOP16
IFI16	MAPK3
IFI16	LRRFIP1
IFI16	IGSF8
IFI16	EIF6
EIF3J	PNKD
EIF3J	GOLM1
EIF3J	EIF6
FN1	VIM
FN1	VAPA
FN1	TOP2A
FN1	SSB
FN1	PSMB5
FN1	PSMA7
FN1	PRKCB
FN1	PPID
FN1	PLG
FN1	PLAT
FN1	PCNA
FN1	PARP1
FN1	NQO1
FN1	NPM1
FN1	NOV
FN1	MYC
FN1	MMP9
FN1	LGALS9
FN1	LGALS3
FN1	LDHA
FN1	KRT8
FN1	KRT19
FN1	KRT18
FN1	IGFBP3
FN1	IGF2BP1
FN1	HSPB1
FN1	HSPA5
FN1	HSP90AB1
FN1	HNRNPK
FN1	HNRNPD
FN1	HNRNPA1
FN1	HMGB1
FN1	HIF1A
FN1	HGF
FN1	GSTP1
FN1	GRB2
FN1	FLNB
FN1	FASLG
FN1	F2
FN1	EIF2S1
EIF2S1	VCAM1
EIF2S1	PRKCD
EIF2S1	PRKCA
EIF2S1	NPM1
EIF2B3	PTGER3
EIF2B3	PNKD
EIF2B3	HNRNPA1
EIF2B3	GPR183
EIF2B3	GOLM1
EIF2B3	EIF2S1
AIM2	PYCARD
AIM2	LAMP1
AIM2	EIF2AK2
CYP1A1	PKN2
CYP1A1	EIF2AK2
ACACA	Sirt1
ACACA	PTEN
ACACA	NPM1
ACACA	MYC
ACACA	IFIT1
ACACA	FN1
ACACA	EGFR
APOB	PPIB
APOB	MTTP
APOB	LDLR
APOB	HSPA5
APOB	HSP90B1
APOB	EGFR
DDX60	EGFR
AP1G2	EGFR
GOT1	SRXN1
GOT1	SOD1
GOT1	NQO1
GOT1	EGFR
ADAR	MYC
ADAR	IFI16
ADAR	HNRNPA1
ADAR	FOXP3
ADAR	EGFR
EGF	SREBF1
EGF	GRB2
EGF	ERBB3
EGF	ERBB2
EGFR	VPS4B
EGFR	VAPA
EGFR	UCHL1
EGFR	TRMT10C
EGFR	TNFRSF1A
EGFR	TLR4
EGFR	TGFB1
EGFR	STAT3
EGFR	STAT1
EGFR	SRC
EGFR	SOCS3
EGFR	SOCS1
EGFR	SH2B3
EGFR	RASA1
EGFR	RAF1
EGFR	PTPRC
EGFR	PTPN1
EGFR	PTK2B
EGFR	PSMD1
EGFR	PSMA7
EGFR	PRKCE
EGFR	PRKCD
EGFR	PRKCB
EGFR	PRKCA
EGFR	PRKACA
EGFR	PPP2R3A
EGFR	PPARGC1A
EGFR	PPARG
EGFR	PML
EGFR	PLCG1
EGFR	PKIA
EGFR	PIM1
EGFR	PIK3R1
EGFR	PCNA
EGFR	NUP153
EGFR	NR3C1
EGFR	MET
EGFR	MAPK8
EGFR	MAPK14
EGFR	MAPK1
EGFR	LGALS3
EGFR	LAMP1
EGFR	KRT8
EGFR	KRT18
EGFR	KCTD9
EGFR	JAK1
EGFR	ITPA
EGFR	IKBKG
EGFR	IGHG1
EGFR	IGFBP3
EGFR	ICAM1
EGFR	HSPB1
EGFR	HSPA5
EGFR	HSP90B1
EGFR	HSP90AB1
EGFR	HK2
EGFR	HCK
EGFR	GRB2
EGFR	GABARAPL2
EGFR	FOS
EGFR	FN1
EGFR	FKBP8
EGFR	FAS
EGFR	ESR1
EGFR	ERBB3
EGFR	ERBB2
EGFR	EPHA2
EGFR	EIF2B3
EGFR	EGF
E2F2	RB1
E2F2	GRB2
E2F1	TP53
E2F1	STAT1
E2F1	Sirt1
E2F1	RB1
E2F1	PARP1
E2F1	NFKB1
E2F1	LAMTOR5
E2F1	GSK3B
E2F1	ESR1
E2F1	E2F2
DRD2	SLC6A3
DRD2	GRIA2
CXCL2	PLG
CXCL2	PIK3R1
CXCL2	DPP4
DPP4	PTPRC
DPP4	IKBKB
DDX58	VAPA
DDX58	STAT1
DDX58	SRC
DDX58	RBCK1
DDX58	PRKCB
DDX58	PRKCA
DDX58	MAVS
DDX58	ISG15
DDX58	IRF3
DDX58	IKBKG
DDX58	IKBKE
DDB1	UCHL1
DDB1	TP53
DDB1	STAT1
DDB1	RASSF1
DDB1	PTEN
DDB1	POLR2A
DDB1	PCNA
DDB1	NR1I2
DDB1	MYC
DDB1	IKBKG
DDB1	E2F1
DCAF5	DDB1
HSPD1	VCAM1
HSPD1	Sirt1
HSPD1	RC3H1
HSPD1	RASA1
HSPD1	RAF1
HSPD1	PTEN
HSPD1	PSMA3
HSPD1	PRKACA
HSPD1	PLG
HSPD1	NR3C1
HSPD1	NOS2
HSPD1	MYC
HSPD1	MAPK14
HSPD1	ISG15
HSPD1	IKBKG
HSPD1	HSPA5
HSPD1	HSP90AB1
HSPD1	HNRNPA1
HSPD1	GSR
HSPD1	GRB2
HSPD1	FN1
HSPD1	ESR1
HSPD1	DCAF5
CYP17A1	POR
CYP17A1	HSP90AB1
CYP17A1	ERBB2
CXCL8	MMP9
CXCL11	DPP4
CXCL10	DPP4
CXCR3	CXCL11
CXCR3	CXCL10
BTBD1	TOP1
BTBD1	CUL5
CUL5	TOP2A
CUL5	SOCS3
CUL5	PRKACA
CUL5	POLR2A
CUL5	PCNA
CUL5	NPM1
CUL5	NOS2
CUL5	NFKB1
CUL5	LDHA
CUL5	IGF2BP1
CUL5	HSPA5
CUL5	HSP90B1
CUL5	HSP90AB1
CUL5	HNRNPK
CUL5	HNRNPD
CUL5	HNRNPA1
CUL5	ERBB2
CUL5	DDX3X
CUL5	DDB1
CTLA4	PIK3R1
CTLA4	FYN
CREB3L1	RUNX1T1
CREB3L1	CREB3
CREB1	XRCC1
CREB1	VIM
CREB1	TRIM22
CREB1	TP53
CREB1	Sirt1
CREB1	SGK1
CREB1	RFX3
CREB1	PRKACA
CREB1	POLR2A
CREB1	NR5A2
CREB1	NR3C1
CREB1	MAPK14
CREB1	JUN
CREB1	GSK3B
CREB1	GPS2
COX5A	NELFCD
COL1A1	MMP9
COL1A1	MMP2
COL1A1	IGFBP3
COL1A1	FN1
CD93	MBL2
CD93	COL1A1
CD209	IKBKE
CD209	HMGCR
CD209	CLEC4M
HSP90AB1	VCAM1
HSP90AB1	UBE3A
HSP90AB1	TRIM56
HSP90AB1	TP53RK
HSP90AB1	TP53
HSP90AB1	TNFAIP3
HSP90AB1	STAT3
HSP90AB1	STAT1
HSP90AB1	SRPK1
HSP90AB1	SREBF1
HSP90AB1	SGK1
HSP90AB1	RAF1
HSP90AB1	PTEN
HSP90AB1	PSMD1
HSP90AB1	PSMB5
HSP90AB1	PSMA3
HSP90AB1	PRKCE
HSP90AB1	PRKCB
HSP90AB1	PRKCA
HSP90AB1	PRKACA
HSP90AB1	PPID
HSP90AB1	PPARG
HSP90AB1	PPARD
HSP90AB1	PKN2
HSP90AB1	PIM1
HSP90AB1	NR3C2
HSP90AB1	NR1I3
HSP90AB1	NR1I2
HSP90AB1	NPM1
HSP90AB1	NOS2
HSP90AB1	NFKB1
HSP90AB1	MET
HSP90AB1	LGALS3
HSP90AB1	LDHA
HSP90AB1	JAK1
HSP90AB1	ISG15
HSP90AB1	IRF3
HSP90AB1	IKBKG
HSP90AB1	IKBKE
HSP90AB1	IKBKB
HSP90AB1	IFIT1
HSP90AB1	HSPB1
HSP90AB1	HSF1
HSP90AB1	HNRNPA1
HSP90AB1	CHUK
HSPB1	VIM
HSPB1	VCAM1
HSPB1	TP53
HSPB1	SMN1
HSPB1	SARS
HSPB1	PSMD1
HSPB1	PSMA3
HSPB1	PRKCD
HSPB1	PLG
HSPB1	NPM1
HSPB1	NOS2
HSPB1	NFKBIA
HSPB1	MYC
HSPB1	KRT18
HSPB1	ITPA
HSPB1	ISG15
HSPB1	IKBKB
HSPB1	HNRNPA1
HSPB1	EIF2S1
HSPB1	CHUK
NFKBIA	TP53
NFKBIA	TNF
NFKBIA	STAT1
NFKBIA	SRC
NFKBIA	SOCS3
NFKBIA	RELA
NFKBIA	PTPN1
NFKBIA	PRKCA
NFKBIA	POLR2A
NFKBIA	PIK3R1
NFKBIA	NFKB1
NFKBIA	MAVS
NFKBIA	MAPK14
NFKBIA	IKBKG
NFKBIA	IKBKE
NFKBIA	IKBKB
NFKBIA	HNRNPA1
NFKBIA	CHUK
ESR1	UBE3A
ESR1	TP53
ESR1	TOP2A
ESR1	TOP1
ESR1	TNFRSF14
ESR1	TAP1
ESR1	STAT3
ESR1	SRPK2
ESR1	SRPK1
ESR1	SREBF1
ESR1	SRC
ESR1	Sirt1
ESR1	RXRA
ESR1	RUVBL1
ESR1	RFX4
ESR1	RELA
ESR1	RBCK1
ESR1	PTPN1
ESR1	PTEN
ESR1	PSMD1
ESR1	PSMB9
ESR1	PRKACA
ESR1	PPP2R3A
ESR1	PPID
ESR1	PPIB
ESR1	PPARGC1A
ESR1	POLR2E
ESR1	POLR2A
ESR1	PIK3R1
ESR1	PIK3CA
ESR1	PGR
ESR1	PARP1
ESR1	NUP153
ESR1	NPM1
ESR1	NOS3
ESR1	NFKB1
ESR1	NCOA2
ESR1	NCOA1
ESR1	MYC
ESR1	MAPK3
ESR1	MAPK14
ESR1	MAPK1
ESR1	KRT8
ESR1	KRT19
ESR1	KRT18
ESR1	JUN
ESR1	IKBKE
ESR1	HSPB1
ESR1	HSP90AB1
ESR1	HNRNPK
ESR1	HNRNPD
ESR1	HNRNPA1
ESR1	HIF1A
ESR1	GRB2
ESR1	FOS
ESR1	FLNB
ESR1	ESR2
ESR1	EIF6
ESR1	CHUK
EIF2AK2	TP53
EIF2AK2	TOP1
EIF2AK2	STAT3
EIF2AK2	STAT1
EIF2AK2	SSB
EIF2AK2	NPM1
EIF2AK2	NFKBIA
EIF2AK2	MOV10
EIF2AK2	MAVS
EIF2AK2	JAK1
EIF2AK2	ISG15
EIF2AK2	IKBKB
EIF2AK2	IFI16
EIF2AK2	HSP90AB1
EIF2AK2	GLTSCR2
EIF2AK2	ELF2
EIF2AK2	EIF6
EIF2AK2	EIF2S1
EIF2AK2	EGFR
EIF2AK2	CHUK
CHRNA7	PIK3R1
CHRNA7	FYN
CHEK2	XRCC1
CHEK2	TP53
CHEK2	SRPK2
CHEK2	SRPK1
CHEK2	Sirt1
CHEK2	RB1
CHEK2	PML
CHEK2	MAPK3
CHEK2	MAPK1
CHEK2	FOS
CHEK2	E2F1
CHEK2	CYP17A1
CHEK1	TP53
CHEK1	RELA
CHEK1	RB1
CHEK1	PCNA
CHEK1	MAPK1
CHEK1	HSP90AB1
CHEK1	HNRNPD
CHEK1	DDB1
CHEK1	CHUK
CHCHD2	USMG5
CHCHD2	TRMT10C
CHCHD2	Sirt1
CHCHD2	COX5A
CREB3	TAP1
CREB3	NFE2L2
CREB3	JUN
CREB3	HMOX1
CREB3	GYPA
CREB3	CES1
CEP44	Sirt1
CEP44	PSMD3
CEP44	PKN2
CEP44	LRRFIP1
CEBPB	TP53
CEBPB	STAT3
CEBPB	RUNX2
CEBPB	RELA
CEBPB	RB1
CEBPB	RARB
CEBPB	PPARG
CEBPB	NR3C1
CEBPB	NOLC1
CEBPB	NFKB1
CEBPB	MYC
CEBPB	MAPK3
CEBPB	MAPK1
CEBPB	JUN
CEBPB	HSF1
CEBPB	HNRNPK
CEBPB	HMGB1
CEBPB	GSK3B
CEBPB	ESR1
CEBPB	ELK1
CEBPB	EGFR
CEBPB	CREB1
CEBPA	VDR
CEBPA	UBE3A
CEBPA	RB1
CEBPA	RARB
CEBPA	PKN2
CEBPA	PARP1
CEBPA	NR3C1
CEBPA	NR1I2
CEBPA	MYC
CEBPA	MAPK8
CEBPA	JUN
CEBPA	HNF1A
CEBPA	GSK3B
CEBPA	GFAP
CEBPA	FOS
CEBPA	ESR1
CEBPA	CEBPB
CDKN3	CEBPA
CCDC85B	KRT18
CCDC85B	CDKN1A
CDKN1A	VIM
CDKN1A	TP53
CDKN1A	STAT3
CDKN1A	RB1
CDKN1A	PSMA3
CDKN1A	PIM1
CDKN1A	PCNA
CDKN1A	PARP1
CDKN1A	NPM1
CDKN1A	NOV
CDKN1A	NFE2L2
CDKN1A	MAPK8
CDKN1A	JUN
CDKN1A	IKBKG
CDKN1A	IGF2BP1
CDKN1A	HSPA5
CDKN1A	HNRNPK
CDKN1A	ESR1
CDKN1A	E2F1
CDKN1A	DDB1
CDKN1A	CHEK1
CDKN1A	CEBPA
CDK4	UCHL1
CDK4	RELA
CDK4	RB1
CDK4	PCNA
CDK4	NCOA2
CDK4	MYC
CDK4	HSP90AB1
CDK4	CEBPA
CDK4	CDKN1A
CDK2	VIM
CDK2	UCHL1
CDK2	TP53
CDK2	TOP1
CDK2	SSB
CDK2	SCN5A
CDK2	SARS
CDK2	RB1
CDK2	PSMD3
CDK2	PPIB
CDK2	POLR2A
CDK2	PML
CDK2	PGR
CDK2	PCNA
CDK2	PARP1
CDK2	NPM1
CDK2	NPEPPS
CDK2	NOV
CDK2	LYZ
CDK2	LDHA
CDK2	IKBKG
CDK2	HSPD1
CDK2	HSPA5
CDK2	HSP90B1
CDK2	HSP90AB1
CDK2	HNRNPK
CDK2	HNRNPD
CDK2	HNRNPA1
CDK2	HMGB1
CDK2	GSTP1
CDK2	FLNB
CDK2	FASN
CDK2	ESR1
CDK2	E2F1
CDK2	DDX3X
CDK2	CEBPA
CDK2	CDKN3
CDK2	CDKN1A
CIITA	Sirt1
CIITA	PRKACA
CIITA	PPARG
CIITA	NCOA1
CIITA	MAPK3
CIITA	MAPK1
CIITA	GSK3B
CIITA	CDK1
CDK1	VIM
CDK1	VCAM1
CDK1	UCHL1
CDK1	TP53
CDK1	TOP2A
CDK1	Sirt1
CDK1	RUNX2
CDK1	RB1
CDK1	PTPN1
CDK1	PRKCB
CDK1	PML
CDK1	PCNA
CDK1	NPM1
CDK1	MYC
CDK1	KRT18
CDK1	IFI16
CDK1	HSPB1
CDK1	HMGB1
CDK1	GFAP
CDK1	FYN
CDK1	FN1
CDK1	EIF2AK2
CDK1	EGFR
CDK1	E2F1
CDK1	CHEK1
CDK1	CDKN3
CDK1	CDKN1A
CDK1	CDK2
HLA-A	TAP2
HLA-A	TAP1
HLA-A	STAT3
HLA-A	IFI16
HLA-A	HLA-E
HLA-A	HLA-DRA
HLA-A	HLA-DQA1
HLA-A	HLA-DPA1
HLA-A	HLA-C
HLA-A	HLA-B
HLA-A	ERBB3
HLA-A	EGFR
HLA-A	CD8A
CD8A	PTPRC
CD8A	HLA-E
CD8A	CDK1
CD86	PARP1
CD86	CTLA4
CD80	CTLA4
CD80	CD86
CD81	NPM1
CD81	IGSF8
CD81	IFITM1
CD81	HNRNPK
CD81	HNRNPD
CD81	HNRNPA1
CD81	HIST1H1E
CD81	DDX3X
CD79A	PTPRC
CD79A	IGHM
CD79A	FYN
CD79A	FN1
HLA-DQB1	CD74
HLA-DRA	SCARB1
HLA-DRA	HSP90AB1
HLA-DRA	CD74
HLA-DPB1	HLA-E
HLA-DPB1	CD74
HLA-DQA1	IKBKG
HLA-DQA1	HLA-DQB1
HLA-DQA1	CD74
HLA-DPA1	TNFSF9
HLA-DPA1	SLC25A15
HLA-DPA1	SCARB1
HLA-DPA1	HLA-DPB1
HLA-DPA1	ERBB3
HLA-DPA1	CD74
CD74	LAMTOR5
CXCR4	STAT3
CXCR4	STAT1
CXCR4	SOCS3
CXCR4	SOCS1
CXCR4	PTPRC
CXCR4	JAK1
CXCR4	DPP4
CXCR4	CD74
CHI3L1	CD55
CD55	FYN
PIK3R1	TNFRSF1A
PIK3R1	STAT3
PIK3R1	SRC
PIK3R1	SOCS1
PIK3R1	Sirt1
PIK3R1	RXRA
PIK3R1	RB1
PIK3R1	RASA1
PIK3R1	PTGER3
PIK3R1	PSMB5
PIK3R1	PLCG1
PIK3R1	PIK3CA
PIK3R1	FASLG
PIK3R1	CD40
PIK3CA	TNFRSF1A
PIK3CA	TICAM1
PIK3CA	STAT1
PIK3CA	SGK1
PIK3CA	FASLG
PIK3CA	CD40
CHUK	TP53
CHUK	TNFRSF1A
CHUK	TNFAIP3
CHUK	TNF
CHUK	SRPK2
CHUK	SRPK1
CHUK	SRC
CHUK	RELA
CHUK	PRKCD
CHUK	PRKCB
CHUK	PRKCA
CHUK	NFKB1
CHUK	MYC
CHUK	MAVS
CHUK	IKBKG
CHUK	IKBKE
CHUK	IKBKB
CHUK	HNRNPA1
CHUK	CD40
SGK1	CD40
IL4R	NCF1
IL4R	JAK1
IL4R	IL4
IL4R	CD40
IKBKB	TP53
IKBKB	TNFRSF1A
IKBKB	TNFAIP3
IKBKB	TNF
IKBKB	SRC
IKBKB	RELA
IKBKB	PRKCE
IKBKB	PRKCD
IKBKB	PRKCB
IKBKB	PRKCA
IKBKB	PPARG
IKBKB	PELI1
IKBKB	PARP1
IKBKB	NFKB1
IKBKB	MAVS
IKBKB	MAPK14
IKBKB	LYZ
IKBKB	JUN
IKBKB	IKBKG
IKBKB	IKBKE
IKBKB	CD40
CD40LG	TP53
CD40LG	IGHG1
CD40LG	CD40
DDX3X	VCAM1
DDX3X	TP53
DDX3X	SRPK2
DDX3X	NPM1
DDX3X	NOS2
DDX3X	MAVS
DDX3X	IKBKE
DDX3X	IGSF8
DDX3X	IFIH1
DDX3X	ICAM1
DDX3X	HNRNPA1
DDX3X	FN1
DDX3X	ESR1
DDX3X	EIF3J
DDX3X	EIF2S1
DDX3X	DDX58
DDX3X	CD40
PSMD1	PSMD3
PSMD1	CD40
CTSD	TG
CTSD	SLC2A4
CTSD	MAPK1
CTSD	LDHA
CTSD	IGFBP3
CTSD	HSP90B1
CTSD	HNRNPA1
CTSD	FN1
CTSD	CUL5
CTSD	CD4
CD14	TLR4
CD14	OASL
CD14	CD55
ARID2	HNRNPA1
ARID2	CD14
CCR2	CCR5
CCL2	PCNA
CCL2	MMP3
CCL2	MMP1
CCL2	CCR5
CCL2	CCR2
CCND1	TP53
CCND1	STAT3
CCND1	SRC
CCND1	RELA
CCND1	RB1
CCND1	PRKACA
CCND1	PCNA
CCND1	NCOA1
CCND1	MAPK1
CCND1	IGFBP3
CCND1	GSK3B
CCND1	ESR1
[truncated: 3,163 more rows]

## Sheet: Table 17
Supplementary Table S17: Four topological feature values of YGL Capsule- Hepatitis B disease target network
Nodes	Betweenness	Closeness	Degree	Eccentricity
licorice	45025.2	0.210084	230	5
Artemisiae Scopariae Herba	19655.7	0.204537	185	5
ABCG2	1.24442	0.175439	4	6
Hedysarum Multijugum Maxim.	28575.2	0.207547	206	5
Radix Bupleuri Multijugum Maxim.	21845.7	0.205684	191	5
Panax Ginseng C. A. Mey.	8146.87	0.194484	117	6
Fortunes Bossfern Rhizome	3437.05	0.189852	82	6
Radix Rhei Et Rhizome	2758.53	0.189459	77	6
Paeoniae Radix Alba	3643.6	0.191771	95	6
ADIPOQ	0	0.173831	1	6
CACNA1S	0	0.163011	1	7
CHRM1	10.1681	0.176339	8	6
CHRM2	10.1681	0.176339	8	6
CHRM3	10.1681	0.176339	8	6
CHRM5	1.90086	0.175159	3	6
CHRNA2	1.42174	0.17263	4	6
CYP19A1	0	0.173831	1	6
CYP1B1	7.50517	0.176056	7	6
DIO1	7.50517	0.176056	7	6
DRD1	4.18873	0.175439	5	6
DUOX2	1.24442	0.175439	4	6
GABRA2	10.1681	0.176339	8	6
GABRA5	3.12139	0.173831	5	6
GABRA6	0	0.17209	1	6
HAS2	7.50517	0.176056	7	6
HSD3B1	0.405949	0.17477	2	6
HSD3B2	0.405949	0.17477	2	6
HTR2A	7.44235	0.175775	7	6
IL1A	1.24442	0.175439	4	6
IL6	1.24442	0.175439	4	6
MAOA	0.384484	0.172144	2	6
NADH6	0.405949	0.17477	2	6
NR1C3	10.1681	0.176339	8	6
ODC1	1.24442	0.175439	4	6
OLR1	1.24442	0.175439	4	6
PLB1	0	0.173831	1	6
SLC6A2	6.10906	0.175944	6	6
SLC6A4	6.29433	0.176	6	6
SLPI	6.10906	0.175944	6	6
TOP2	10.1681	0.176339	8	6
UGT1A1	0	0.173831	1	6
AKR1B1	179.474	0.179739	10	5
ABAT	9.3805	0.176226	3	6
CAV1	3878.91	0.193935	46	5
ABCB1	50.092	0.168453	5	6
CD4	2303.39	0.180151	22	6
LGALS3	2696.91	0.181219	14	6
ABCC1	18.4233	0.180151	5	6
FASN	218.919	0.188163	18	5
FKBP8	194.695	0.178224	16	6
APP	25668.9	0.194484	92	6
ACHE	110.908	0.182482	9	5
ERBB2	1717.88	0.190443	32	5
ACPP	1.55913	0.178282	6	6
MAPK1	2580.61	0.19469	63	5
YWHAE	1269.47	0.184626	34	6
ADH1B	14.6198	0.176056	4	6
ADH1C	23.0043	0.173556	4	6
ADI1	0	0.164425	2	7
ADRA1B	127.52	0.181878	12	6
ADRA1D	2.08177	0.175775	4	6
ADRA2A	29.6462	0.176113	5	6
ADRB1	54.1373	0.179856	6	6
HLA-B	2491.11	0.18104	28	6
ADRB2	1650.27	0.18959	30	5
HLA-C	2228	0.174825	16	6
AFP	6.18911	0.154494	2	7
AGTR1	46.8434	0.173174	7	6
AGT	11.6194	0.171233	3	6
AHR	147.601	0.183028	16	6
AIP	163.12	0.174659	9	6
AKR1C1	31.5502	0.179445	4	5
AKR1C3	38.8791	0.176339	7	6
AKT1	4647.27	0.197699	64	5
ALB	3553.21	0.179856	27	6
ALOX5	197.234	0.185811	12	5
GRB2	5672.96	0.191171	68	6
PRKACA	4587.11	0.19278	43	5
HCK	95.6409	0.180683	14	6
AMBP	94.0465	0.173776	7	6
ANXA5	192.136	0.174382	6	6
APOA2	1287.7	0.16697	6	6
APOBEC3F	0	0.146354	1	7
APOE	706.213	0.172306	9	6
AR	4003.62	0.195521	56	5
ATG12	127.939	0.174161	8	6
ATG5	149.441	0.172522	11	6
ATP5B	414.868	0.188744	18	5
APC	289.205	0.174437	13	6
AXIN1	33.7519	0.174326	8	6
BAD	52.4033	0.18407	14	6
BCL2L1	615.516	0.184874	17	6
BAX	789.924	0.185623	22	6
PYCARD	201.527	0.170279	8	6
BECN1	165.364	0.176395	13	6
BIRC5	117.021	0.182059	12	6
BLNK	38.3471	0.170226	5	6
C18orf21	7.78904	0.168763	2	6
CFB	34.2893	0.16335	4	7
CCNA2	234.122	0.186504	23	5
HTR2C	0	0.166869	2	6
CASP3	2700.01	0.193526	42	5
CDH1	353.051	0.180092	20	6
SMPD1	0	0.16472	2	6
CASP8	2901.87	0.193186	40	5
CASP9	95.1966	0.184874	19	5
CAT	75.8365	0.183578	5	5
CCL5	440.578	0.172252	11	6
CCNB1	27.7976	0.183639	14	5
CCND1	129.081	0.188615	23	5
CCL2	955.667	0.17834	9	5
CCR2	0	0.154973	2	6
CD40	163.962	0.172684	10	6
DDX3X	1002.08	0.181458	23	6
CD40LG	85.3532	0.180151	7	6
IKBKB	2100.77	0.192375	40	5
IL4R	29.4703	0.16306	5	6
SGK1	63.111	0.173283	7	6
PIK3CA	199.819	0.177248	13	6
CD55	1230.77	0.155367	3	7
CD74	937.424	0.166515	8	7
HLA-DQA1	113.958	0.161527	4	7
HLA-DQB1	17.2333	0.155675	3	7
CD8A	107.263	0.167939	6	6
CDK1	2770.79	0.193118	44	5
CIITA	10.5782	0.173447	8	6
CDK2	3431.54	0.19339	56	5
CDK4	182.208	0.187585	15	5
CDKN1A	1785.2	0.19305	39	5
CCDC85B	0.361111	0.164671	2	6
CEBPB	871.152	0.182542	26	6
CEP44	221.12	0.168247	5	6
CREB3	1405.48	0.166869	9	6
CES1	51.9447	0.174437	2	6
CHCHD2	1214.68	0.165116	5	6
CHEK1	265.422	0.189786	21	5
CHEK2	754.253	0.187906	18	5
CHRNA7	214.094	0.184626	10	5
EIF2AK2	1820.32	0.1823	26	6
ESR1	9160.21	0.199203	85	5
NFKBIA	630.198	0.190906	26	5
HSPB1	1954.75	0.192847	37	5
HSP90AB1	11739.9	0.199637	86	5
CD209	1100.74	0.160537	3	6
CLEC4M	0	0.138469	1	7
COL1A1	1112.8	0.179387	9	5
COX5A	8.53968	0.146354	2	7
CREB3L1	360.964	0.153846	3	6
CTLA4	547.908	0.159698	4	7
CUL5	621.493	0.18104	23	6
BTBD1	0.582276	0.163399	2	6
CXCR3	3.05131	0.15493	3	7
CXCL10	378.509	0.176339	6	6
CXCL11	378.509	0.176339	6	6
CXCL8	45.9275	0.176339	6	6
CYP17A1	26.5638	0.17102	6	6
HSPD1	1270.38	0.187777	34	6
DCAF5	30.5162	0.178513	6	6
DDB1	302.445	0.178282	18	6
DDX58	232.47	0.176452	14	6
DGAT1	0	0.143229	1	7
CXCL2	56.2132	0.178978	7	6
DRD2	9.99041	0.167173	4	6
E2F1	291.309	0.187906	22	5
E2F2	8.11855	0.180505	7	6
EGFR	17571.1	0.201318	93	5
EGF	18.0921	0.183517	9	5
ADAR	105.335	0.173666	5	6
GOT1	570.84	0.181518	6	5
AP1G2	0	0.167785	1	6
ACACA	258.137	0.186377	11	5
CYP1A1	148.433	0.178051	9	6
AIM2	5.33927	0.155984	3	7
EIF2S1	125.579	0.174881	10	6
FN1	7731.09	0.189264	60	6
EIF3J	480.445	0.167581	5	6
IFI16	5756.88	0.1823	29	6
EIF6	2278.29	0.189198	23	5
HNRNPD	370.176	0.182603	22	6
GLTSCR2	10.5235	0.168971	5	6
ELF2	7.73209	0.164868	2	7
CLDN4	58.8544	0.176792	5	6
EPHA2	150.98	0.178571	8	6
HSP90B1	812.333	0.181339	23	6
ERBB3	2578.71	0.191039	26	5
ESR2	95.3648	0.18475	18	5
F2	494.723	0.18218	18	5
SERPINE1	90.9973	0.179915	12	6
F8	8.53262	0.179387	8	5
IGFBP3	229.173	0.185999	18	5
SPP1	85.8212	0.182603	12	5
PLG	753	0.175439	19	6
F3	23.2556	0.176849	6	6
F7	159.12	0.181339	11	6
FAS	90.4199	0.17834	15	6
PML	1288.79	0.185748	38	6
MAPK8	1864.07	0.193798	41	5
MET	907.539	0.186567	22	5
TNF	4055.05	0.186377	25	5
TNFRSF1A	1235.24	0.183946	30	6
PRKCA	3028.11	0.192173	44	5
FYN	3915.65	0.18315	35	6
RB1	1340.31	0.192375	49	6
NCF1	585.612	0.183946	16	6
FBXL2	11.748	0.174216	3	6
FLNB	73.4842	0.178804	13	6
CRP	32.0497	0.180743	7	5
APOBEC3C	27.8026	0.164819	3	7
FOSL2	0	0.176963	3	6
FOXP3	29.5491	0.169231	4	6
PTK2B	131.62	0.178862	15	6
AIRE	49.2801	0.177305	11	6
GABARAPL2	110.313	0.176056	8	6
GABRA1	54.4649	0.179153	11	6
GFAP	184.956	0.182907	15	6
GJA1	124.321	0.182907	12	5
GOLM1	2.57356	0.14881	2	7
CHRM4	13.1106	0.180033	7	6
GRIA2	106.22	0.177134	6	6
GSK3B	2722.85	0.193458	45	5
GSR	34.4658	0.179563	6	6
GSTM1	7.50517	0.176113	8	6
GSTM2	9.32323	0.176565	9	6
GSTP1	230.282	0.18556	15	5
GYPA	0	0.143155	1	7
HIF1A	169.252	0.190311	23	5
HIST1H1E	12.9074	0.168453	5	6
SLC2A4	26.9062	0.178282	9	6
HK2	441.573	0.181938	9	5
MICA	2261.27	0.158001	4	7
HLA-E	173.746	0.158776	6	7
NR3C1	2749.73	0.193798	44	5
HMGCR	746.791	0.176906	3	6
HMOX1	516.367	0.181279	11	5
HNF1A	134.526	0.177077	12	6
HNRNPA1	7683.55	0.188744	49	6
IGF2BP1	285.406	0.179856	14	6
APOBEC3B	7.3754	0.161527	2	7
MOV10	59.2504	0.171821	6	6
TP53	10196.8	0.198484	88	5
MX1	24.6921	0.174548	4	6
LAMP1	259.425	0.173228	7	6
IGSF8	190.306	0.174051	10	6
NOS2	928.049	0.190114	30	5
ICAM1	958.87	0.18733	17	5
SSB	233.135	0.178687	11	6
ITPA	27.8678	0.171821	4	6
HTR3A	2.79535	0.178629	4	5
CDK5RAP3	0.289401	0.169701	3	6
CA2	38.498	0.179974	10	5
CCDC86	7.82935	0.163108	3	7
IFNA2	7.08743	0.153546	3	7
IFNG	348.08	0.177591	7	5
IFNGR1	74.0401	0.168042	6	6
IFNL2	1092	0.13061	2	8
IFNL3	0	0.130548	1	8
IFNLR1	0	0.115619	1	9
IGF2	82.5836	0.177591	8	6
IGHG1	185.41	0.185623	12	5
IGHM	146.051	0.173611	5	6
RBCK1	251.093	0.178051	11	6
IKBKG	3948.56	0.18733	49	6
MAVS	660.695	0.176452	19	6
KRT18	470.761	0.1823	22	6
IL1B	230.591	0.185811	11	5
PRKCE	192.615	0.181698	19	6
PRKCB	1225.78	0.190575	26	5
MYC	2935.07	0.194966	53	5
IL10	4345.24	0.175887	5	6
IL2	672.834	0.176282	6	6
IL2RA	39.727	0.16866	5	6
IL13	25.6517	0.165463	3	6
INSR	583.947	0.187713	26	5
IRF3	245.407	0.177706	15	6
ISG15	1050.05	0.176622	21	6
JAK1	1423.41	0.183762	28	6
JUN	3700.34	0.193798	46	5
KCNH2	56.8611	0.181698	11	6
KCNMA1	53.934	0.179797	5	6
KCTD9	32.6979	0.168196	2	6
NPM1	4381.43	0.19018	52	6
STAT1	4220.93	0.193867	51	5
VEGFA	2.80563	0.178862	6	6
RASA1	935.324	0.191371	28	5
KIR2DL3	19.2548	0.164474	2	7
LAMTOR5	310.675	0.173556	8	6
LGALS9	5.64728	0.166566	3	6
LTBR	299.007	0.168608	7	6
MAP2	222.228	0.185248	10	5
PRKCD	930.291	0.18663	31	6
MAPK10	73.8492	0.185685	8	5
MAPK14	1183.11	0.19224	39	5
MAPK3	2929.56	0.192442	45	5
MB	0	0.163011	1	7
MMP2	126.875	0.17892	9	5
MMP3	201.217	0.178456	10	6
MMP9	77.0864	0.180683	9	5
CP	2.32711	0.156294	2	6
MPO	602.921	0.175607	5	6
MTTP	5.49379	0.174714	3	6
MGAM	1.24442	0.175831	5	6
NCOA1	1075.14	0.188615	36	5
NR3C2	84.0404	0.183394	12	5
NCOA2	758.345	0.186188	31	6
NELFA	71.2131	0.165215	3	7
NFKB1	3298.48	0.183394	38	6
IRF1	48.7942	0.182421	8	6
NKX3-1	19.7681	0.178224	6	6
NOLC1	52.4286	0.173174	6	6
NOV	50.0313	0.172198	7	6
NPEPPS	50.4256	0.181159	7	5
NQO1	84.6659	0.183824	10	5
NR1I2	537.109	0.186441	20	5
NR1I3	62.8725	0.184008	14	5
NR5A2	80.5592	0.167326	7	6
OASL	0	0.131108	1	8
OPRM1	108.382	0.179915	10	5
PARP1	2919.06	0.192442	37	5
PATL1	9.58085	0.170279	3	6
PCNA	991.284	0.184688	28	6
COL3A1	1.24442	0.175551	5	6
PCOLCE	23.4768	0.176282	6	6
PDE3A	8.68822	0.182059	9	5
PELI1	3.07587	0.166264	3	6
PIK3CG	73.1303	0.181458	11	6
GABRA3	21.6386	0.176113	7	6
PIM1	439.988	0.188356	15	5
PKIA	2.84501	0.18218	5	5
PKN2	825.847	0.173776	11	6
ACBD3	4.50055	0.151682	2	7
PLAU	357.31	0.179563	11	6
SELE	208.848	0.177706	9	6
PNKD	1283.63	0.17049	6	6
INTS10	2.42547	0.164967	3	6
PSMB9	226.62	0.17477	14	6
POLR2E	295.538	0.176339	14	6
CYP1A2	9.97184	0.176339	8	6
POR	204.598	0.180505	10	5
CYP3A4	15.0865	0.179095	10	6
PPARA	440.583	0.186567	21	5
PPARD	163.904	0.185185	16	5
PPARG	1030.24	0.192915	34	5
PPARGC1A	190.373	0.17892	19	6
PPIB	99.7018	0.175159	11	6
PRRC2C	6.77273	0.170068	3	6
PSMA7	657.505	0.182119	22	6
PSMB5	178.927	0.17702	13	6
PSMB8	112.381	0.170226	10	6
PTGS2	208.391	0.186821	14	5
PSMD3	1315.27	0.185748	24	5
PTEN	431.684	0.189003	24	5
PTGER3	408.645	0.179095	7	6
PTGS1	11.865	0.17892	10	6
PTPN1	232.331	0.188485	23	5
PTPRC	1523.05	0.177706	16	6
PUM3	60.1235	0.175215	6	6
RARB	13.043	0.164572	6	6
RASSF1	312.753	0.181219	10	6
E4F1	2.78204	0.167888	3	6
RC3H1	53.2541	0.173228	8	6
Sirt1	3291.23	0.191571	41	5
RXRA	905.711	0.188679	30	5
SOCS3	327.521	0.179387	14	6
SOCS1	1359.09	0.179915	16	6
STAT3	2603.1	0.19373	44	5
RFX1	202.279	0.153932	3	7
RUNX2	120.887	0.18475	17	6
RUVBL1	455.333	0.178456	14	6
RXRG	32.5242	0.170807	7	6
SARAF	0	0.155148	1	7
SELL	17.4316	0.169492	4	6
CPPED1	0	0.00181818	1	1
SEPSECS	0	0.00181818	1	1
SERPINB3	0.890382	0.165763	2	6
SMC5	1092	0.150232	2	7
SOAT2	0	0.177419	2	6
PDCD1	0	0.152651	1	7
HIBADH	0	0.153846	1	6
SRPK1	1191.59	0.182907	22	6
MAOB	36.1311	0.178167	6	6
SRPK2	2277.69	0.180862	23	6
SRXN1	10.7399	0.160866	2	6
SUPV3L1	0	0.15896	1	7
THBD	1.24442	0.176282	5	6
THBS4	0	0.163011	1	7
PYGM	1.24442	0.177477	5	6
TOP2A	1129.16	0.19018	26	5
TRMT10C	161.166	0.172902	3	6
USMG5	10.902	0.144775	2	7
LPGAT1	0	0.154364	1	7
VDR	351.914	0.179036	21	6
XRCC1	72.7285	0.173611	7	6
